# Supplementary material for: DNA-guided establishment of nucleosome patterns within coding regions of a eukaryotic genome
Source: HighWire-hosted journal article supplement (doi:10.1101/gr.188516.114), 2015-09-01
Supplement: Revised_TableS4.pdf [file Revised_TableS4.pdf]

Table S4

|            |       |                  | Codon Frequency                                                                          |                               |                                               |                    |
|------------|-------|------------------|------------------------------------------------------------------------------------------|-------------------------------|-----------------------------------------------|--------------------|
| Amino Acid | Codon | Codon GC content | Within DNA-guided nucleosomes, relative to within <i>trans</i> factor-guided nucleosomes | Within DNA-guided nucleosomes | Within <i>trans</i> factor-guided nucleosomes | Within all regions |
| A          | GCG   | 1.000            | 0.361                                                                                    | 0.019                         | 0.052                                         | 0.019              |
| A          | GCT   | 0.667            | 0.857                                                                                    | 0.537                         | 0.626                                         | 0.537              |
| A          | GCA   | 0.667            | 1.309                                                                                    | 0.348                         | 0.266                                         | 0.340              |
| A          | GCC   | 1.000            | 1.705                                                                                    | 0.097                         | 0.057                                         | 0.104              |
| C          | TGT   | 0.333            | 0.672                                                                                    | 0.465                         | 0.693                                         | 0.535              |
| C          | TGC   | 0.667            | 1.742                                                                                    | 0.535                         | 0.307                                         | 0.465              |
| D          | GAT   | 0.333            | 0.923                                                                                    | 0.801                         | 0.868                                         | 0.805              |
| D          | GAC   | 0.667            | 1.510                                                                                    | 0.199                         | 0.132                                         | 0.195              |
| E          | GAA   | 0.333            | 0.951                                                                                    | 0.801                         | 0.842                                         | 0.811              |
| E          | GAG   | 0.667            | 1.261                                                                                    | 0.199                         | 0.158                                         | 0.189              |
| F          | TTC   | 0.333            | 0.942                                                                                    | 0.313                         | 0.332                                         | 0.311              |
| F          | TTT   | 0.000            | 1.029                                                                                    | 0.687                         | 0.668                                         | 0.689              |
| G          | GGA   | 0.667            | 0.737                                                                                    | 0.434                         | 0.588                                         | 0.438              |
| G          | GGT   | 0.667            | 1.082                                                                                    | 0.391                         | 0.361                                         | 0.398              |
| G          | GGC   | 1.000            | 3.255                                                                                    | 0.117                         | 0.036                                         | 0.112              |
| G          | GGG   | 1.000            | 3.997                                                                                    | 0.059                         | 0.015                                         | 0.053              |
| H          | CAT   | 0.333            | 0.929                                                                                    | 0.667                         | 0.718                                         | 0.695              |
| H          | CAC   | 0.667            | 1.181                                                                                    | 0.333                         | 0.282                                         | 0.305              |
| I          | ATA   | 0.000            | 0.725                                                                                    | 0.333                         | 0.460                                         | 0.346              |
| I          | ATT   | 0.000            | 1.224                                                                                    | 0.509                         | 0.416                                         | 0.509              |
| I          | ATC   | 0.333            | 1.268                                                                                    | 0.158                         | 0.124                                         | 0.146              |
| K          | AAA   | 0.000            | 0.957                                                                                    | 0.696                         | 0.727                                         | 0.707              |
| K          | AAG   | 0.333            | 1.114                                                                                    | 0.304                         | 0.273                                         | 0.293              |
| L          | CTC   | 0.667            | 0.835                                                                                    | 0.095                         | 0.114                                         | 0.072              |
| L          | TTA   | 0.000            | 0.864                                                                                    | 0.388                         | 0.449                                         | 0.414              |
| L          | CTT   | 0.333            | 0.878                                                                                    | 0.212                         | 0.241                                         | 0.217              |
| L          | CTA   | 0.333            | 1.396                                                                                    | 0.100                         | 0.072                                         | 0.107              |
| L          | TTG   | 0.333            | 1.600                                                                                    | 0.174                         | 0.108                                         | 0.159              |
| L          | CTG   | 0.667            | 1.991                                                                                    | 0.031                         | 0.016                                         | 0.031              |

**Table S4.** Biases in synonymous codon usage are encoded within distinct nucleosomal regions. DNA-guided and *trans*-factor guided nucleosomes are defined as in Supplemental Fig. S19. We examined nucleosomes from the log-phase dataset (light MNase digest), and from the set "B" *in vitro* experiment (performed with 4:10 histone:DNA, light MNase digest). Codons were considered as lying within a nucleosome, according to criteria described in Supplemental Table S3. Each group of synonymous codons was analyzed separately. The most GC-rich codon(s) within each group of synonymous codon is highlighted in red. For each codon, we calculated the ratio of its frequency in sequences that lie within DNA-guided nucleosomes, to its corresponding frequency within sequences that lie within *trans* factor-guided nucleosomes. Codons enriched in DNA-guided nucleosomes have the corresponding value > 1, and are highlighted in red. It quantifies the impact of accommodating DNA-guided nucleosomes on synonymous codon usage. The underlying codon usage for 13 out of 18 amino acids was biased towards GC-rich codons within coding regions that overlap with DNA-guided nucleosomes. Two amino acids (methionine and tryptophan) only have one corresponding codon each, and were excluded from this analysis.

**Table S4 (contd.)**

|            |       |                  | Codon Frequency                                                                          |                               |                                               |                    |
|------------|-------|------------------|------------------------------------------------------------------------------------------|-------------------------------|-----------------------------------------------|--------------------|
| Amino Acid | Codon | Codon GC content | Within DNA-guided nucleosomes, relative to within <i>trans</i> factor-guided nucleosomes | Within DNA-guided nucleosomes | Within <i>trans</i> factor-guided nucleosomes | Within all regions |
| N          | AAT   | 0.000            | 0.917                                                                                    | 0.722                         | 0.787                                         | 0.739              |
| N          | AAC   | 0.333            | 1.308                                                                                    | 0.278                         | 0.213                                         | 0.261              |
| P          | CCC   | 1.000            | 0.520                                                                                    | 0.096                         | 0.184                                         | 0.090              |
| P          | CCA   | 0.667            | 0.738                                                                                    | 0.320                         | 0.433                                         | 0.335              |
| P          | CCG   | 1.000            | 1.014                                                                                    | 0.012                         | 0.012                                         | 0.015              |
| P          | CCT   | 0.667            | 1.543                                                                                    | 0.572                         | 0.371                                         | 0.560              |
| Q          | CAA   | 0.333            | 0.894                                                                                    | 0.234                         | 0.261                                         | 0.225              |
| Q          | TAA   | 0.000            | 0.950                                                                                    | 0.522                         | 0.550                                         | 0.556              |
| Q          | TAG   | 0.333            | 1.120                                                                                    | 0.192                         | 0.172                                         | 0.172              |
| Q          | CAG   | 0.667            | 3.055                                                                                    | 0.052                         | 0.017                                         | 0.047              |
| R          | AGA   | 0.333            | 0.902                                                                                    | 0.719                         | 0.797                                         | 0.729              |
| R          | CGT   | 0.667            | 0.982                                                                                    | 0.093                         | 0.094                                         | 0.108              |
| R          | CGA   | 0.667            | 0.985                                                                                    | 0.015                         | 0.016                                         | 0.017              |
| R          | CGC   | 1.000            | 1.798                                                                                    | 0.036                         | 0.020                                         | 0.036              |
| R          | AGG   | 0.667            | 1.864                                                                                    | 0.135                         | 0.072                                         | 0.108              |
| R          | CGG   | 1.000            | 4.550                                                                                    | 0.003                         | 0.001                                         | 0.002              |
| S          | TCG   | 0.667            | 0.452                                                                                    | 0.022                         | 0.049                                         | 0.024              |
| S          | AGT   | 0.333            | 0.808                                                                                    | 0.194                         | 0.240                                         | 0.210              |
| S          | TCA   | 0.333            | 0.992                                                                                    | 0.267                         | 0.269                                         | 0.250              |
| S          | TCT   | 0.333            | 1.075                                                                                    | 0.319                         | 0.297                                         | 0.313              |
| S          | AGC   | 0.667            | 1.362                                                                                    | 0.146                         | 0.107                                         | 0.149              |
| S          | TCC   | 0.667            | 1.363                                                                                    | 0.053                         | 0.039                                         | 0.054              |
| T          | ACA   | 0.333            | 0.745                                                                                    | 0.354                         | 0.475                                         | 0.376              |
| T          | ACT   | 0.333            | 1.120                                                                                    | 0.488                         | 0.436                                         | 0.496              |
| T          | ACC   | 0.667            | 1.711                                                                                    | 0.136                         | 0.079                                         | 0.105              |
| T          | ACG   | 0.667            | 2.320                                                                                    | 0.022                         | 0.010                                         | 0.022              |
| V          | GTG   | 0.667            | 0.843                                                                                    | 0.087                         | 0.103                                         | 0.084              |
| V          | GTT   | 0.333            | 0.909                                                                                    | 0.500                         | 0.550                                         | 0.495              |
| V          | GTA   | 0.333            | 1.130                                                                                    | 0.281                         | 0.249                                         | 0.297              |
| V          | GTC   | 0.667            | 1.348                                                                                    | 0.132                         | 0.098                                         | 0.124              |
| Y          | TAT   | 0.000            | 0.845                                                                                    | 0.667                         | 0.789                                         | 0.695              |
| Y          | TAC   | 0.333            | 1.579                                                                                    | 0.333                         | 0.211                                         | 0.305              |
| M          | ATG   | 0.333            | 1.000                                                                                    | 1.000                         | 1.000                                         | 1.000              |
| W          | TGG   | 0.667            | 1.000                                                                                    | 1.000                         | 1.000                                         | 1.000              |
